# Supplementary figures and images for: Assessing the Genetic Diversity of Wild and Commercial Feijoa sellowiana Accessions Using AFLPs
Source: MDPI journal article supplement (doi:10.3390/horticulturae10040366), 2024-04-06

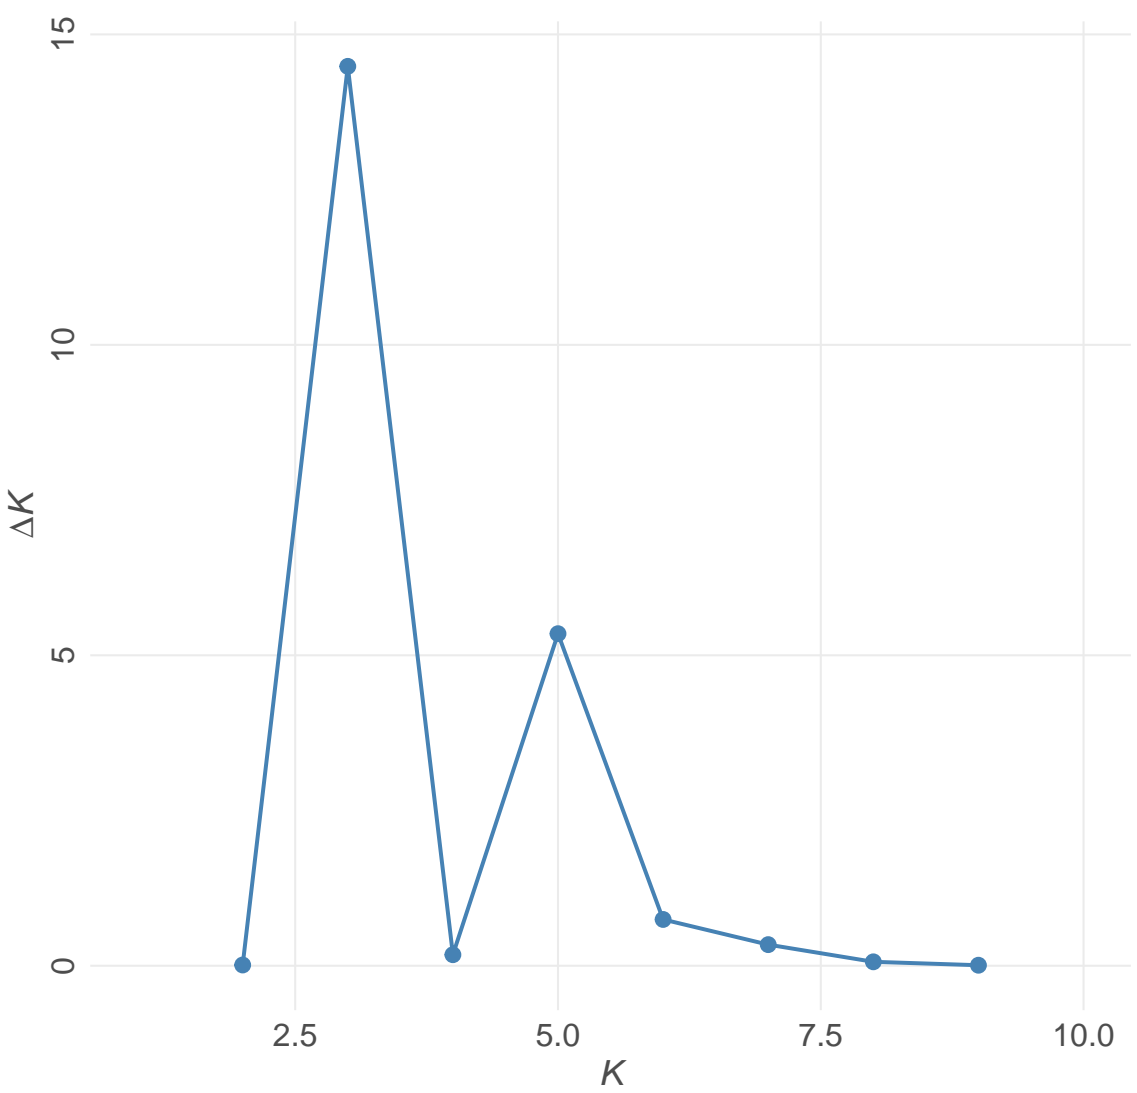

Supplement: s1 [file s1]
